# Supplementary material
Source: PubMed Central journal article supplement (PMC6599567)
Supplement: NIHMS1528529-supplement-2.pdf [file NIHMS1528529-supplement-2.pdf]

## Supplementary Tables

### **Supplementary Table 1. Primers used to clone LADL plasmids**

See attached .xls file.

### **Supplementary Table 2. Primers and matched plasmids for cloning LADL constructs.**

| <b>Name of insert</b>                      | <b>Primers</b>  | <b>PCR template</b> | <b>Size (bp)</b> |
|--------------------------------------------|-----------------|---------------------|------------------|
| <i><b>LADL Anchor Control plasmid</b></i>  |                 |                     |                  |
| EF1a                                       | MRP177, MRP 188 | Addgene #47457      | 1237             |
| 3XFLAG-dCas9                               | MRP189, MRP 190 | dCas9 plasmid       | 4300             |
| GS-CIBN                                    | MRP198, MRP 199 | Addgene #47457      | 649              |
| 2A-Puro                                    | MRP200, MRP 182 | Addgene #62987      | 681              |
| <i><b>Empty anchor Control plasmid</b></i> |                 |                     |                  |
| EF1a                                       | MRP036, JV002   | Addgene #47457      | 1237             |
| Puro                                       | JV001, MRP 051  | Addgene #62987      | 681              |
| <i><b>Empty target Control plasmid</b></i> |                 |                     |                  |
| EF1a                                       | MRP177, MRP 178 | Addgene #47457      | 1247             |
| CRY2PHR                                    | MRP179, MRP 183 | Addgene #47457      | 1700             |
| 2A-mCherry                                 | MRP184, MRP 185 | CRY2olig mut 2-1    | 681              |

**Supplementary Table 3. List of gRNA primer sequences**

| <b>Primer number</b> | <b>gRNA Primer name</b> | <b>gRNA sequence</b>        | <b>Backbone plasmid (single clone)</b> | <b>Multiplex</b>                                         |
|----------------------|-------------------------|-----------------------------|----------------------------------------|----------------------------------------------------------|
| 129                  | <i>Klf4_Enh_1_F</i>     | CACCGTACATGCAGTAGTACTAAGT   | S12.1                                  | <b>Desert gRNAs (<i>Klf4/ Zfp462</i>)</b>                |
| 130                  | <i>Klf4_Enh_1_R</i>     | AAACACTTAGTACTACTGCATGTAC   | S12.1                                  |                                                          |
| 135                  | <i>Klf4_Enh_2_F</i>     | CACCGTTTGTGTTTTAGTG TAGATT  | B1                                     |                                                          |
| 136                  | <i>Klf4_Enh_2_R</i>     | AAACAATCTACACTAAAACACAAAC   | B1                                     |                                                          |
| 115                  | <i>Zfp462_Prom_2_F</i>  | CACCGTAAAGAAAAGTGT TTTATCGA | B2                                     |                                                          |
| 116                  | <i>Zfp462_Prom_2_R</i>  | AAACTCGATAAAACACTTTTCTTTAC  | B2                                     |                                                          |
| 117                  | <i>Zfp462_Prom_1_F</i>  | CACCGAAGTGTTTATCGAGGGAAAG   | B3                                     |                                                          |
| 118                  | <i>Zfp462_Prom_1_R</i>  | AAACCTTTCCCTCGATAAAACACTTC  | B3                                     |                                                          |
| 115                  | <i>Zfp462_Prom_2_F</i>  | CACCGTAAAGAAAAGTGT TTTATCGA | S12.1                                  | <b>Promoter only Target plasmid (<i>Zfp462</i> only)</b> |
| 116                  | <i>Zfp462_Prom_2_R</i>  | AAACTCGATAAAACACTTTTCTTTAC  | S12.1                                  |                                                          |
| 117                  | <i>Zfp462_Prom_1_F</i>  | CACCGAAGTGTTTATCGAGGGAAAG   | B1                                     |                                                          |
| 118                  | <i>Zfp462_Prom_1_R</i>  | AAACCTTTCCCTCGATAAAACACTTC  | B1                                     |                                                          |

**Supplementary Table 4. List of plasmids with individual gRNAs without soluble CRY2**

| <b>gRNA<br/>in<br/>plasmid</b> | <b>gRNA<br/>Primer name</b> | <b>BbsI digested<br/>plasmid backbone</b> | <b>Targeting<br/>region</b> | <b>Genomic<br/>feature of<br/>target</b> | <b>Refer to</b>                    |
|--------------------------------|-----------------------------|-------------------------------------------|-----------------------------|------------------------------------------|------------------------------------|
| 129                            | <i>Klf4_Enh_1_F</i>         | S12.1                                     | Engineered<br>Loop Anchor 2 | Desert near<br>SE                        | <b>Supplementary<br/>Figure 2e</b> |
| 135                            | <i>Klf4_Enh_2_F</i>         | B1<br>(Addgene # 58778)                   | Engineered<br>Loop Anchor 2 | Desert near<br>SE                        | <b>Supplementary<br/>Figure 2f</b> |
| 115                            | <i>Zfp462_Prom_2_F</i>      | B2<br>(Addgene # 58779)                   | Engineered<br>Loop Anchor 1 | Desert near<br><i>Zfp462</i> TSS         | <b>Supplementary<br/>Figure 2g</b> |
| 117                            | <i>Zfp462_Prom_1_F</i>      | B3<br>(Addgene # 58780)                   | Engineered<br>Loop Anchor 1 | Desert near<br><i>Zfp462</i> TSS         | <b>Supplementary<br/>Figure 2h</b> |

**Supplementary Table 5. List of plasmids with multiplexed gRNAs without soluble CRY2**

| <b>gRNAs in plasmid</b>  | <b>gRNA Primer name</b>                                                                        | <b>BsaI digest plasmid backbone</b> | <b>Targeting region</b>                          | <b>Multiplex Plasmid name</b> | <b>Refer to</b>                |
|--------------------------|------------------------------------------------------------------------------------------------|-------------------------------------|--------------------------------------------------|-------------------------------|--------------------------------|
| 129<br>135<br>115<br>117 | <i>Klf4_Enh_1_F</i><br><i>Klf4_Enh_2_F</i><br><i>Zfp462_Prom_2_F</i><br><i>Zfp462_Prom_1_F</i> | S12.1                               | Desert near SE and Desert near <i>Zfp462</i> TSS | Empty bridge control plasmid  | <b>Supplementary Figure 2i</b> |

**Supplementary Table 6. List of plasmids with multiplexed gRNAs with soluble CRY2**

| <b>gRNAs in plasmid</b>  | <b>gRNA Primer name</b>                                                                        | <b>BsaI digest plasmid backbone</b> | <b>Targeting region</b>                             | <b>Multiplex Plasmid name</b> | <b>Refer to</b>                    |
|--------------------------|------------------------------------------------------------------------------------------------|-------------------------------------|-----------------------------------------------------|-------------------------------|------------------------------------|
| 129<br>135<br>115<br>117 | <i>Klf4_Enh_1_F</i><br><i>Klf4_Enh_2_F</i><br><i>Zfp462_Prom_2_F</i><br><i>Zfp462_Prom_1_F</i> | S12.1                               | Desert near SE and<br>Desert near <i>Zfp462</i> TSS | LADL Bridge +<br>Target       | <b>Supplementary<br/>Figure 2l</b> |
| 115<br>117               | <i>Zfp462_Prom_2_F</i><br><i>Zfp462_Prom_1_F</i>                                               | S12.1                               | Desert near <i>Zfp462</i> TSS                       | One-sided<br>guide Control    | <b>Supplementary<br/>Figure 2m</b> |

**Supplementary Table 7. List of primers used for RNA qRT-PCR**

| <b>Name</b>                   | <b>Sequence</b>            |
|-------------------------------|----------------------------|
| Nanog_F_MR137                 | TGCCTGCAGTTTTTCATCCC       |
| Nanog_R_MR138                 | TAGAAGAATCAGGGCTGCCTTG     |
| Mouse_GAPDH_F_MR141           | GCACAGTCAAGGCCGAGAAT       |
| Mouse_GAPDH_R_MR142           | GCCTTCTCCATGGTGGTGAA       |
| Sox2_F_MR143                  | GCACATGAACGGCTGGAGCAACG    |
| Sox2_R_MR144                  | TGCTGCGAGTAGGACATGCTGTAGG  |
| <i>Klf4</i> _F_MR147          | AGACCAGATGCAGTCACAAGTC     |
| <i>Klf4</i> _R_MR148          | TTTTGCCACAGCCTGCATAG       |
| Oct4_F_MR151                  | TGTGGACCTCAGGTTGGACT       |
| Oct4_R_MR152                  | TTTCATGTCCTGGGACTCCTC      |
| MRP213_qPCR_ <i>Zfp462</i> _F | GCCAACTGATGTTGCCGAGGACAATG |
| MRP214_qPCR_ <i>Zfp462</i> _R | CCTGAAGTAGCGTACGCAGAACTTG  |
| MRP215_qPCR_Zhang_dCas9_F     | GCACAGCATCAAGAAGAACCTG     |
| MRP216_qPCR_Zhang_dCas9_R     | CGTTGCTGAAGATCTCTTGCGAG    |
| MRP149_CRY2_qPCR_F            | AATGCCTCGACATGTCCATC       |
| MRP150_CRY2_qPCR_F            | AGCGCGTTACTGGGTTTTTC       |
| Nestin_Fwd_JB                 | AGGCCACTGAAAAGTTCCAG       |
| Nestin_Rev_JB                 | TAAGGGACATCTTGAGGTGTGC     |

**Supplementary Table 8: Summary of external sequencing libraries analyzed in this study**  
See attached .xls file.

**Supplementary Table 9. List of primers used for Chromatin Immunoprecipitation**

| <b>Primer number</b> | <b>ChIP Primer name</b>            | <b>Sequence</b>         | <b>Target region</b>                      |
|----------------------|------------------------------------|-------------------------|-------------------------------------------|
| MRP217               | MRP217_IP_Down_Y<br>_ED_129to135_F | TGGGCCTACTTAGTACTACTGC  | Engineered site at SE                     |
| MRP218               | MRP218_IP_Down_Y<br>_ED_129to135_R | GCTGGGTAAGTAGCCCTCTAC   | Engineered site at SE                     |
| MRP221               | MRP221_IP_Down_H<br>_ED_115to117_F | AAGCCCCTTTCCCTCGATAAAC  | Engineered site at <i>Zfp462</i> promoter |
| MRP222               | MRP222_IP_Down_H<br>_ED_115to117_R | ACACTAGGAGGATGGGGATAGTC | Engineered site at <i>Zfp462</i> promoter |
| MRP223               | MRP223_IP_H_CTCF<br>_149to155_F    | GCTCTATGTTCTAACACCTCTCC | Negative control                          |
| MRP224               | MRP224_IP_H_CTCF<br>_149to155_R    | CGTGCTTGTACACACACACAG   | Negative control                          |

**Supplementary Table 10. 5C Primer Sequences.**

See attached .xls file.

**Supplementary Table 11. 5C Primer Genomic Coordinates.**

See attached .xls file.

**Supplementary Table 12: Summary of mapped 5C sequencing reads**

See attached .xls file.

**Supplementary Table 13. Fluorescence-labeled oligonucleotide sequences for RNA FISH.**

See attached .xls file.
